# Supplementary material for: Genome-wide screening and functional analysis identify a large number of long noncoding RNAs involved in the sexual reproduction of rice
Source: PubMed Central journal article supplement (PMC4253996; doi:10.1186/s13059-014-0512-1), 2014-12-03
Supplement: 13059_2014_512_MOESM10_ESM.pdf [file 13059_2014_512_MOESM10_ESM.pdf]

>osa-miR395h MIMAT0000963 Score: 4.5 TCONS\_00100257 gene=XLOC\_057032

Query: 1 GTGAAGTGT--T-TGGGGGAACTC 21  
|||:|:\*\*|\*|||:|:||||\*  
Sbjct: 1232 CACTTTATAGTACACCTCTTTGAT 1209

>osa-miR156b-5p MIMAT0000619 Score: 2.0 TCONS\_00043170 gene=XLOC\_024537

Query: 1 TGACAGAAG--A-GAGTGAGCAC 20  
|||||||:\*\*|\*|\*|||||||  
Sbjct: 719 ACTGTCTTT CTCCTCACTCGTG 697

>osa-miR156b-5p MIMAT0000619 Score: 2.0 TCONS\_00043171 gene=XLOC\_024537

Query: 1 TGACAGAAG--A-GAGTGAGCAC 20  
|||||||:\*\*|\*|\*|||||||  
Sbjct: 719 ACTGTCTTT CTCCTCACTCGTG 697

>osa-miR156b-5p MIMAT0000619 Score: 2.0 TCONS\_00043172 gene=XLOC\_024537

Query: 1 TGACAGAAG--A-GAGTGAGCAC 20  
|||||||:\*\*|\*|\*|||||||  
Sbjct: 719 ACTGTCTTT CTCCTCACTCGTG 697

>osa-miR156b-5p MIMAT0000619 Score: 2.0 TCONS\_00043174 gene=XLOC\_024537

Query: 1 TGACAGAAG--A-GAGTGAGCAC 20  
|||||||:\*\*|\*|\*|||||||  
Sbjct: 719 ACTGTCTTT CTCCTCACTCGTG 697

>osa-miR156b-5p MIMAT0000619 Score: 2.0 TCONS\_00043175 gene=XLOC\_024537

Query: 1 TGACAGAAG--A-GAGTGAGCAC 20  
|||||||:\*\*|\*|\*|||||||  
Sbjct: 719 ACTGTCTTT CTCCTCACTCGTG 697

>osa-miR156b-5p MIMAT0000619 Score: 2.0 TCONS\_00043176 gene=XLOC\_024537

Query: 1 TGACAGAAG--A-GAGTGAGCAC 20  
|||:\*\*\*|\*|||  
Sbjct: 719 ACTGTCTTT CTCCTCACTCGTG 697

>osa-miR156b-5p MIMAT0000619 Score: 4.5 TCONS\_00076760 gene=XLOC\_043053

Query: 1 TGACAGAAG-AG--AGTGAGCAC 20  
||\*|||\*|\*\*|||\*|\*  
Sbjct: 398 ACCGTCTCCTCTTTCACCTCCTT 376

>osa-miR156b-5p MIMAT0000619 Score: 4.5 TCONS\_00087104 gene=XLOC\_049223

Query: 1 TGACAGAAG-AG--AGTGAGCAC 20  
|||\*||\*\*|||:|\*  
Sbjct: 1646 ACTGTCTTACTCT TCATTTGTT 1624

>osa-miR395p MIMAT0003873 Score: 4.5 TCONS\_00100257 gene=XLOC\_057032

Query: 1 GTGAAGTGT--T-TGGGGGAAGTC 21  
|||:|\*|\*||:|\*  
Sbjct: 1232 CACTTTATAGTACACCTCTTGAT 1209

>osa-miR395y MIMAT0014125 Score: 4.5 TCONS\_00100257 gene=XLOC\_057032

Query: 1 GTGAAGTGT--T-TGGGGGAAGTC 21  
|||:|\*|\*||:|\*  
Sbjct: 1232 CACTTTATAGTACACCTCTTGAT 1209

>osa-miR169r-5p MIMAT0026762 Score: 4.0 TCONS\_00086804 gene=XLOC\_049024

Query: 1 TAGCCAAGG-AT--GATTGCCTG 21  
||:||||\*|\*\*||||\*|\*  
Sbjct: 5288 ATTGGTTCTATATCCTAAACGAGC 5265

>osa-miR169r-5p MIMAT0026762 Score: 4.5 TCONS\_00087224 gene=XLOC\_049308

Query: 1 TAGCCAAGG-AT--GATTGCCTG 21  
:||||\*|\*|\*\*||||\*|\*|\*  
Sbjct: 5288 ATTGGTTCTATATCCTAAACGAGC 5265

Sbjct: 690 GTCGGTTACATATCCTAACCGGAT 667

>osa-miR169r-5p MIMAT0026762 Score: 4.5 TCONS\_00087226 gene=XLOC\_049308

Query: 1 TAGCCAAGG-AT--GATTGCCTG 21  
:|||||\*|\*|\*\*||||\*||||:

Sbjct: 690 GTCGGTTACATATCCTAACCGGAT 667

>osa-miR169r-5p MIMAT0026762 Score: 4.5 TCONS\_00087227 gene=XLOC\_049308

Query: 1 TAGCCAAGG-AT--GATTGCCTG 21  
:|||||\*|\*|\*\*||||\*||||:

Sbjct: 704 GTCGGTTACATATCCTAACCGGAT 681

>osa-miR156h-3p MIMAT0031157 Score: 4.5 TCONS\_00098451 gene=XLOC\_055866

Query: 1 GCTCACTTCT--C-TTCTGTCAGC 22  
||\*||||||\*\*|\*||||||\*\*

Sbjct: 758 CGTGTGAAGAGTGTAAGACAGTGA 734

>osa-miR156g-5p MIMAT0000624 Score: 2.0 TCONS\_00043170 gene=XLOC\_024537

Query: 1 TGACAGAAG--A-GAGTGAGCAC 20  
|||||||:\*\*|\*|||||||

Sbjct: 719 ACTGTCTTT CTCCTCACTCGTG 697

>osa-miR156g-5p MIMAT0000624 Score: 2.0 TCONS\_00043171 gene=XLOC\_024537

Query: 1 TGACAGAAG--A-GAGTGAGCAC 20  
|||||||:\*\*|\*|||||||

Sbjct: 719 ACTGTCTTT CTCCTCACTCGTG 697

>osa-miR156g-5p MIMAT0000624 Score: 2.0 TCONS\_00043172 gene=XLOC\_024537

Query: 1 TGACAGAAG--A-GAGTGAGCAC 20  
|||||||:\*\*|\*|||||||

Sbjct: 719 ACTGTCTTT CTCCTCACTCGTG 697

>osa-miR156g-5p MIMAT0000624 Score: 2.0 TCONS\_00043174 gene=XLOC\_024537

Query: 1 TGACAGAAG--A-GAGTGAGCAC 20  
||| | | | | | | | : \*\* | \* | | | | | | | | | |  
Sbjct: 719 ACTGTCTTT CTCCTCACTCGTG 697

>osa-miR156g-5p MIMAT0000624 Score: 2.0 TCONS\_00043175 gene=XLOC\_024537

Query: 1 TGACAGAAG--A-GAGTGAGCAC 20  
||| | | | | | | | : \*\* | \* | | | | | | | | | |  
Sbjct: 719 ACTGTCTTT CTCCTCACTCGTG 697

>osa-miR156g-5p MIMAT0000624 Score: 2.0 TCONS\_00043176 gene=XLOC\_024537

Query: 1 TGACAGAAG--A-GAGTGAGCAC 20  
||| | | | | | | | : \*\* | \* | | | | | | | | | |  
Sbjct: 719 ACTGTCTTT CTCCTCACTCGTG 697

>osa-miR156g-5p MIMAT0000624 Score: 4.5 TCONS\_00076760 gene=XLOC\_043053

Query: 1 TGACAGAAG-AG--AGTGAGCAC 20  
|| \* | | | | | | \* | | \*\* | | | | | | \* | \*  
Sbjct: 398 ACCGTCTTCCTCTTTCACCTCCTT 376

>osa-miR156g-5p MIMAT0000624 Score: 4.5 TCONS\_00087104 gene=XLOC\_049223

Query: 1 TGACAGAAG-AG--AGTGAGCAC 20  
||| | | | | | | | \*\* | | \*\* | | | | : : | | \*  
Sbjct: 1646 ACTGTCTTACTCT TCATTTGTT 1624

>osa-miR159d MIMAT0001025 Score: 4.5 TCONS\_00043583 gene=XLOC\_024724

Query: 1 ATTGGATTG-A--AGGGAGCTCCG 21  
| : | | | | | | | \* | \*\* | | : | | \* | | \* | |  
Sbjct: 700 TGACCTAACCTCCTCTCTGGAAGC 677

>osa-miR159d MIMAT0001025 Score: 4.5 TCONS\_00043584 gene=XLOC\_024724

Query: 1 ATTGGATTG-A--AGGGAGCTCCG 21  
|:|||||||\*||\*||\*||\*||  
Sbjct: 700 TGACCTAACCTCCTCTCTGGAAGC 677

>osa-miR159d MIMAT0001025 Score: 4.5 TCONS\_00043585 gene=XLOC\_024724

Query: 1 ATTGGATTG-A--AGGGAGCTCCG 21  
|:|||||||\*||\*||\*||\*||  
Sbjct: 700 TGACCTAACCTCCTCTCTGGAAGC 677

>osa-miR159d MIMAT0001025 Score: 4.5 TCONS\_00043586 gene=XLOC\_024724

Query: 1 ATTGGATTG-A--AGGGAGCTCCG 21  
|:|||||||\*||\*||\*||\*||  
Sbjct: 827 TGACCTAACCTCCTCTCTGGAAGC 804

>osa-miR160a-5p MIMAT0000628 Score: 3.5 TCONS\_00111350 gene=XLOC\_063639

Query: 1 TGCCTGGCT---CCCTGTATGCCA 21  
|||||||\*||\*||\*||\*||\*  
Sbjct: 532 ACGGACCGAAAGGGAACATACGGC 509

>osa-miR166c-5p MIMAT0022857 Score: 4.5 TCONS\_00072868 gene=XLOC\_040881

Query: 1 GGAATGTTG-T--CTGGTCCGAG 20  
|:|||||||\*||\*||\*||\*||:  
Sbjct: 2966 CTTTACAACAATCGACCACGGTT 2944

>osa-miR166c-5p MIMAT0022857 Score: 4.5 TCONS\_00072869 gene=XLOC\_040881

Query: 1 GGAATGTTG-T--CTGGTCCGAG 20  
|:|||||||\*||\*||\*||\*||:  
Sbjct: 3719 CTTTACAACAATCGACCACGGTT 3697

>osa-miR166c-5p MIMAT0022857 Score: 4.5 TCONS\_00102306 gene=XLOC\_058088

Query: 1 GGAATGTTGT--C-TGGTCCGAG 20

|||||||::\*\*|\*|||\*|:|:  
Sbjct: 452 CCTTACAGTACTGTACCACGTTT 430

>osa-miR1561-5p MIMAT0001021 Score: 4.5 TCONS\_00043170 gene=XLOC\_024537

Query: 1 CGACAGAAG--A-GAGTGAGCATA 21  
\*|||||||:\*\*|\*|||||||:|\*  
Sbjct: 719 ACTGTCTTT CTCCTCACTCGTGC 696

>osa-miR1561-5p MIMAT0001021 Score: 4.5 TCONS\_00043171 gene=XLOC\_024537

Query: 1 CGACAGAAG--A-GAGTGAGCATA 21  
\*|||||||:\*\*|\*|||||||:|\*  
Sbjct: 719 ACTGTCTTT CTCCTCACTCGTGC 696

>osa-miR1561-5p MIMAT0001021 Score: 4.5 TCONS\_00043172 gene=XLOC\_024537

Query: 1 CGACAGAAG--A-GAGTGAGCATA 21  
\*|||||||:\*\*|\*|||||||:|\*  
Sbjct: 719 ACTGTCTTT CTCCTCACTCGTGC 696

>osa-miR1561-5p MIMAT0001021 Score: 4.5 TCONS\_00043174 gene=XLOC\_024537

Query: 1 CGACAGAAG--A-GAGTGAGCATA 21  
\*|||||||:\*\*|\*|||||||:|\*  
Sbjct: 719 ACTGTCTTT CTCCTCACTCGTGC 696

>osa-miR1561-5p MIMAT0001021 Score: 4.5 TCONS\_00043175 gene=XLOC\_024537

Query: 1 CGACAGAAG--A-GAGTGAGCATA 21  
\*|||||||:\*\*|\*|||||||:|\*  
Sbjct: 719 ACTGTCTTT CTCCTCACTCGTGC 696

>osa-miR1561-5p MIMAT0001021 Score: 4.5 TCONS\_00043176 gene=XLOC\_024537

Query: 1 CGACAGAAG--A-GAGTGAGCATA 21  
\*|||||||:\*\*|\*|||||||:|\*  
Sbjct: 719 ACTGTCTTT CTCCTCACTCGTGC 696



>osa-miR166g-3p MIMAT0001072 Score: 3.5 TCONS\_00068571 gene=XLOC\_038526

Query: 1 TCGGACCAG---GCTTCATTCTC 21  
|||:\*\*\*|||\*|||:|  
Sbjct: 839 AGCCTGGTTAAGCGAACTAAGGGG 816

>osa-miR156f-3p MIMAT0022847 Score: 4.5 TCONS\_00098451 gene=XLOC\_055866

Query: 1 GCTCACTTCT--C-TTTCTGTCAGC 22  
||\*|||\*\*|\*|||\*\*  
Sbjct: 758 CGTGTGAAGAGTGTAAGACAGTGA 734

>osa-miR395q MIMAT0003874 Score: 4.5 TCONS\_00100257 gene=XLOC\_057032

Query: 1 GTGAAGTGT--T-TGGGGAACTC 21  
|||:|\*\*|\*|||:|\*  
Sbjct: 1232 CACTTTATAGTACACCTTTGAT 1209

>osa-miR167d-3p MIMAT0022872 Score: 4.5 TCONS\_00026523 gene=XLOC\_014915

Query: 1 GATCATGCT--G-TGCAGTTTCATC 22  
\*|||\*\*|\*|||\*|  
Sbjct: 901 GTAGTACGAGACAAGGTCAAAGTTG 877

>osa-miR156j-5p MIMAT0000627 Score: 2.0 TCONS\_00043170 gene=XLOC\_024537

Query: 1 TGACAGAAG--A-GAGTGAGCAC 20  
|||:\*\*\*|\*|||  
Sbjct: 719 ACTGTCTTT CTCCTCACTCGTG 697

>osa-miR156j-5p MIMAT0000627 Score: 2.0 TCONS\_00043171 gene=XLOC\_024537

Query: 1 TGACAGAAG--A-GAGTGAGCAC 20  
|||:\*\*\*|\*|||  
Sbjct: 719 ACTGTCTTT CTCCTCACTCGTG 697

>osa-miR156j-5p MIMAT0000627 Score: 2.0 TCONS\_00043172 gene=XLOC\_024537



Query: 1 TGACAGAAG--A-GAGTGAGCAC 20  
||| | | | | | | | : \*\* | \* | | | | | | | | | |  
Sbjct: 719 ACTGTCTTT CTCCTCACTCGTG 697

>osa-miR156j-5p MIMAT0000627 Score: 2.0 TCONS\_00043174 gene=XLOC\_024537

Query: 1 TGACAGAAG--A-GAGTGAGCAC 20  
||| | | | | | | | : \*\* | \* | | | | | | | | | |  
Sbjct: 719 ACTGTCTTT CTCCTCACTCGTG 697

>osa-miR156j-5p MIMAT0000627 Score: 2.0 TCONS\_00043175 gene=XLOC\_024537

Query: 1 TGACAGAAG--A-GAGTGAGCAC 20  
||| | | | | | | | : \*\* | \* | | | | | | | | | |  
Sbjct: 719 ACTGTCTTT CTCCTCACTCGTG 697

>osa-miR156j-5p MIMAT0000627 Score: 2.0 TCONS\_00043176 gene=XLOC\_024537

Query: 1 TGACAGAAG--A-GAGTGAGCAC 20  
||| | | | | | | | : \*\* | \* | | | | | | | | | |  
Sbjct: 719 ACTGTCTTT CTCCTCACTCGTG 697

>osa-miR156j-5p MIMAT0000627 Score: 4.5 TCONS\_00076760 gene=XLOC\_043053

Query: 1 TGACAGAAG-AG--AGTGAGCAC 20  
| | \* | | | | | | \* | \*\* | | | | | | \* | \*  
Sbjct: 398 ACCGTCTTCCTCTTTCACCTCCTT 376

>osa-miR156j-5p MIMAT0000627 Score: 4.5 TCONS\_00087104 gene=XLOC\_049223

Query: 1 TGACAGAAG-AG--AGTGAGCAC 20  
| | | | | | | | \*\* | \*\* | | | : | : | \*  
Sbjct: 1646 ACTGTCTTACTCT TCATTTGTT 1624

>osa-miR395e MIMAT0000961 Score: 4.5 TCONS\_00100257 gene=XLOC\_057032

Query: 1 GTGAAGTGT--T-TGGGGGAAGTC 21  
| | | | | : | : \*\* | \* | | | : | : | | | \*  
Sbjct: 1646 ACTGTCTTACTCT TCATTTGTT 1624

Sbjct: 1232 CACTTTATAGTACACCTCTTTGAT 1209

>osa-miR160c-5p MIMAT0000630 Score: 3.5 TCONS\_00111350 gene=XLOC\_063639

Query: 1 TGCCTGGCT---CCCTGTATGCCA 21

|||||||\*\*\*|\*|||||||\*

Sbjct: 532 ACGGACCGAAAGGGAACATACGGC 509

>osa-miR395m MIMAT0003870 Score: 4.5 TCONS\_00100257 gene=XLOC\_057032

Query: 1 GTGAAGTGT--T-TGGGGGAAGTC 21

|||||:|:\*\*\*|\*|||:|:||||\*

Sbjct: 1232 CACTTTATAGTACACCTCTTTGAT 1209

>osa-miR319a-5p MIMAT0020914 Score: 4.5 TCONS\_00022704 gene=XLOC\_012605

Query: 1 AGCTGCCGAA-T--CATCCATTCA 21

|||:|||:\*\*\*|\*|||\*|||\*|||\*

Sbjct: 2333 TCGGCGGTGTGATGGTAGTAAGA 2310

>osa-miR166k-3p MIMAT0001037 Score: 4.5 TCONS\_00011308 gene=XLOC\_006054

Query: 1 TCGGACCAG---GCTTCAATCCCT 21

|||||||\*\*\*||:|||||\*||:

Sbjct: 462 AGCCTGGTACTGCGGAGTTAAGGG 439

>osa-miR166k-3p MIMAT0001037 Score: 4.5 TCONS\_00068571 gene=XLOC\_038526

Query: 1 TCGGACCAG---GCTTCAATCCCT 21

|||||||:\*\*\*|||\*|||\*|||:

Sbjct: 839 AGCCTGGTTAAGCGAACTAAGGGG 816

>osa-miR156l-3p MIMAT0022866 Score: 4.5 TCONS\_00098451 gene=XLOC\_055866

Query: 1 GCTCACTTCT--C-TTTCTGTCAGC 22

||\*||||||\*\*|\*|||||||\*\*

Sbjct: 758 CGTGTGAAGAGTGTAAGACAGTGA 734

>osa-miR166d-3p MIMAT0000638 Score: 3.0 TCONS\_00068571 gene=XLOC\_038526

Query: 1 TCGGACCAG---GCTTCATCCCC 21  
|||:\*\*\*|||\*|||  
Sbjct: 839 AGCCTGGTTAAGCGAACTAAGGGG 816

>osa-miR156e MIMAT0000622 Score: 2.0 TCONS\_00043170 gene=XLOC\_024537

Query: 1 TGACAGAAG--A-GAGTGAGCAC 20  
|||:\*\*\*|\*|||  
Sbjct: 719 ACTGTCTTT CTCCTCACTCGTG 697

>osa-miR156e MIMAT0000622 Score: 2.0 TCONS\_00043171 gene=XLOC\_024537

Query: 1 TGACAGAAG--A-GAGTGAGCAC 20  
|||:\*\*\*|\*|||  
Sbjct: 719 ACTGTCTTT CTCCTCACTCGTG 697

>osa-miR156e MIMAT0000622 Score: 2.0 TCONS\_00043172 gene=XLOC\_024537

Query: 1 TGACAGAAG--A-GAGTGAGCAC 20  
|||:\*\*\*|\*|||  
Sbjct: 719 ACTGTCTTT CTCCTCACTCGTG 697

>osa-miR156e MIMAT0000622 Score: 2.0 TCONS\_00043174 gene=XLOC\_024537

Query: 1 TGACAGAAG--A-GAGTGAGCAC 20  
|||:\*\*\*|\*|||  
Sbjct: 719 ACTGTCTTT CTCCTCACTCGTG 697

>osa-miR156e MIMAT0000622 Score: 2.0 TCONS\_00043175 gene=XLOC\_024537

Query: 1 TGACAGAAG--A-GAGTGAGCAC 20  
|||:\*\*\*|\*|||  
Sbjct: 719 ACTGTCTTT CTCCTCACTCGTG 697

>osa-miR156e MIMAT0000622 Score: 2.0 TCONS\_00043176 gene=XLOC\_024537

Query: 1 TGACAGAAG--A-GAGTGAGCAC 20  
|||||||:\*\*|\*|||||||  
Sbjct: 719 ACTGTCTTT CTCCTCACTCGTG 697

>osa-miR156e MIMAT0000622 Score: 4.5 TCONS\_00076760 gene=XLOC\_043053

Query: 1 TGACAGAAG-AG--AGTGAGCAC 20  
||\*|||||\*|\*\*|||||\*\*  
Sbjct: 398 ACCGTCTTCCTCTTTCACCTCCTT 376

>osa-miR156e MIMAT0000622 Score: 4.5 TCONS\_00087104 gene=XLOC\_049223

Query: 1 TGACAGAAG-AG--AGTGAGCAC 20  
|||||||\*\*|\*\*||:|\*  
Sbjct: 1646 ACTGTCTTACTCT TCATTGT 1624

>osa-miR156d MIMAT0000621 Score: 2.0 TCONS\_00043170 gene=XLOC\_024537

Query: 1 TGACAGAAG--A-GAGTGAGCAC 20  
|||||||:\*\*|\*|||||||  
Sbjct: 719 ACTGTCTTT CTCCTCACTCGTG 697

>osa-miR156d MIMAT0000621 Score: 2.0 TCONS\_00043171 gene=XLOC\_024537

Query: 1 TGACAGAAG--A-GAGTGAGCAC 20  
|||||||:\*\*|\*|||||||  
Sbjct: 719 ACTGTCTTT CTCCTCACTCGTG 697

>osa-miR156d MIMAT0000621 Score: 2.0 TCONS\_00043172 gene=XLOC\_024537

Query: 1 TGACAGAAG--A-GAGTGAGCAC 20  
|||||||:\*\*|\*|||||||  
Sbjct: 719 ACTGTCTTT CTCCTCACTCGTG 697

>osa-miR156d MIMAT0000621 Score: 2.0 TCONS\_00043174 gene=XLOC\_024537

Query: 1 TGACAGAAG--A-GAGTGAGCAC 20

|||||||:\*\*|\*|  
Sbjct: 719 ACTGTCTTT CTCCTCACTCGTG 697

>osa-miR156d MIMAT0000621 Score: 2.0 TCONS\_00043175 gene=XLOC\_024537

Query: 1 TGACAGAAG--A-GAGTGAGCAC 20  
|||||||:\*\*|\*|  
Sbjct: 719 ACTGTCTTT CTCCTCACTCGTG 697

>osa-miR156d MIMAT0000621 Score: 2.0 TCONS\_00043176 gene=XLOC\_024537

Query: 1 TGACAGAAG--A-GAGTGAGCAC 20  
|||||||:\*\*|\*|  
Sbjct: 719 ACTGTCTTT CTCCTCACTCGTG 697

>osa-miR156d MIMAT0000621 Score: 4.5 TCONS\_00076760 gene=XLOC\_043053

Query: 1 TGACAGAAG-AG--AGTGAGCAC 20  
||\*|||||\*|\*\*|||||\*|\*  
Sbjct: 398 ACCGTCTTCCTCTTTCACCTCCTT 376

>osa-miR156d MIMAT0000621 Score: 4.5 TCONS\_00087104 gene=XLOC\_049223

Query: 1 TGACAGAAG-AG--AGTGAGCAC 20  
|||||||\*\*||\*\*|||:|:|\*  
Sbjct: 1646 ACTGTCTTACTCT TCATTGTGTT 1624

>osa-miR529a MIMAT0002885 Score: 4.5 TCONS\_00007478 gene=XLOC\_003882

Query: 1 CTGTACCCT-CT--CTCTTCTTC 20  
|||||\*\*|:\*|\*\*|||||:|  
Sbjct: 738 GACATTCGGTGAGTGAGAAGGAG 716

>osa-miR529a MIMAT0002885 Score: 4.5 TCONS\_00030527 gene=XLOC\_017512

Query: 1 CTGTACCCT---CTCTTCTTC 20  
|||\*|\*|\*\*\*|  
Sbjct: 249 GACTTTGGTGGTGAGAGAAGAAG 227

>osa-miR529a MIMAT0002885 Score: 4.5 TCONS\_00039632 gene=XLOC\_022908

```
Query:      1 CTGTACCCT-C-T-CTCTTCTTC 20
              |:|*||*||*||*|||
Sbjct:      668 GCGCGGAAGGAAGGAGAAGAAG 646
```

>osa-miR529a MIMAT0002885 Score: 3.5 TCONS\_00056638 gene=XLOC\_031432

```
Query:      1 CTGTACCCT-C-T-CTCTTCTTC 20
              ||:|*||*||*||*|||
Sbjct:      337 GATATTGGAAGAAGGAGGAGAAG 315
```

>osa-miR529a MIMAT0002885 Score: 4.5 TCONS\_00056928 gene=XLOC\_031563

```
Query:      1 CTGTACCCT-CT--CTCTTCTTC 20
              ||*||*||*||*||*|||:|
Sbjct:      27 GAGAGGGGAAGAGGGAGAGGGAG 5
```

>osa-miR408-5p MIMAT0022884 Score: 4.5 TCONS\_00086475 gene=XLOC\_048799

```
Query:      1 CAGGGATGA-G--GCAGAGCATGG 21
              *|||*||*||*||*||*||
Sbjct:      790 ATCCCTACT CGACGTCTAGTAAC 767
```

>osa-miR2118c MIMAT0011742 Score: 4.5 TCONS\_00044208 gene=XLOC\_025107

```
Query:      1 TTCCCGATG-CC--TCCTATTCCTA 22
              |||*|:|*||*||*|||:|
Sbjct:      1124 AAGTGTTAGAGGATAGGATAAGGGT 1100
```

>osa-miR164a MIMAT0000633 Score: 4.5 TCONS\_00100980 gene=XLOC\_057427

```
Query:      1 TGGAGAAGC-A-G-GGCACGTGCA 21
              |||:|*||*||*||*||:|
Sbjct:      732 ACCTTTTCGTTGCGTCGTGTGC T 709
```

>osa-miR166m MIMAT0001087 Score: 3.5 TCONS\_00068571 gene=XLOC\_038526

Query: 1 TCGGACCAG---GCTTCATTCCCT 21  
|||\*|||:\*\*\*|||\*|||:  
Sbjct: 839 AGCCTGGTTAAGCGAACTAAGGGG 816

>osa-miR528-5p MIMAT0002884 Score: 4.5 TCONS\_00010253 gene=XLOC\_005464

Query: 1 TGGAAGGGGC-A--TGCAGAGGAG 21  
:|\*|||:|\*||\*||\*|||:  
Sbjct: 256 GCCGTCCTCGTTGAACGACTCCTC 233

>osa-miR528-5p MIMAT0002884 Score: 4.5 TCONS\_00010254 gene=XLOC\_005464

Query: 1 TGGAAGGGGC-A--TGCAGAGGAG 21  
:|\*|||:|\*||\*||\*|||:  
Sbjct: 542 GCCGTCCTCGTTGAACGACTCCTC 519

>osa-miR528-5p MIMAT0002884 Score: 4.5 TCONS\_00010255 gene=XLOC\_005464

Query: 1 TGGAAGGGGC-A--TGCAGAGGAG 21  
:|\*|||:|\*||\*||\*|||:  
Sbjct: 542 GCCGTCCTCGTTGAACGACTCCTC 519

>osa-miR528-5p MIMAT0002884 Score: 4.5 TCONS\_00004039 gene=XLOC\_002180

Query: 1 TGGAAGGGGC--A-TGCAGAGGAG 21  
|||\*|||\*\*||\*||\*|||:  
Sbjct: 354 ACCTCCCCGCTTGACCTCGCCTC 331

>osa-miR528-5p MIMAT0002884 Score: 4.5 TCONS\_00045558 gene=XLOC\_025866

Query: 1 TGGAAGGGG---CATGCAGAGGAG 21  
|\*:|||:\*\*\*|||\*|||:  
Sbjct: 1453 AATTCCTCAGAGTACGTCTACTC 1430

>osa-miR528-5p MIMAT0002884 Score: 4.5 TCONS\_00054114 gene=XLOC\_030298

Query: 1 TGAAGGGGC-A--TGCAGAGGAG 21  
: ||\*|||: ||\*\*|||\*|||  
Sbjct: 484 GCCGTCCTCGCTGAACGACTCCTC 461

>osa-miR528-5p MIMAT0002884 Score: 4.5 TCONS\_00054115 gene=XLOC\_030298

Query: 1 TGAAGGGGC-A--TGCAGAGGAG 21  
: ||\*|||: ||\*\*|||\*|||  
Sbjct: 484 GCCGTCCTCGCTGAACGACTCCTC 461

>osa-miR528-5p MIMAT0002884 Score: 4.5 TCONS\_00054116 gene=XLOC\_030298

Query: 1 TGAAGGGGC-A--TGCAGAGGAG 21  
: ||\*|||: ||\*\*|||\*|||  
Sbjct: 484 GCCGTCCTCGCTGAACGACTCCTC 461

>osa-miR528-5p MIMAT0002884 Score: 4.5 TCONS\_00054117 gene=XLOC\_030298

Query: 1 TGAAGGGGC-A--TGCAGAGGAG 21  
: ||\*|||: ||\*\*|||\*|||  
Sbjct: 484 GCCGTCCTCGCTGAACGACTCCTC 461

>osa-miR395o MIMAT0003872 Score: 4.5 TCONS\_00045975 gene=XLOC\_026103

Query: 1 ATGAAGTGT-TT--GGAGGAACTC 21  
|||\*|||\*|\*\*\*: |||||: |  
Sbjct: 1099 TACTACACATAATGGTTCCTTGGG 1076

>osa-miR395g MIMAT0000962 Score: 4.5 TCONS\_00100257 gene=XLOC\_057032

Query: 1 GTGAAGTGT--T-TGGGGGAACTC 21  
||| |: |\*\*|\*|||: |: |||\*  
Sbjct: 1232 CACTTTATAGTACACCTTTGAT 1209

>osa-miR164d MIMAT0001034 Score: 4.5 TCONS\_00013342 gene=XLOC\_007028

Query: 1 TGGAGAAGC--A-GGGCACGTGCT 21  
: |: |: |||\*\*|\*|: |: |||: |\*|



Sbjct: 1194 ATCTTTTCGTATGCTCGTGTAGGA 1171

>osa-miR395r MIMAT0003878 Score: 4.5 TCONS\_00100257 gene=XLOC\_057032

Query: 1 GTGAAGTGT--T-TGGGGGAAGTC 21

|||||:|:\*|\*|||:|\*|||\*

Sbjct: 1232 CACTTTATAGTACACCTCTTTGAT 1209

>osa-miR399k MIMAT0000994 Score: 4.5 TCONS\_00038693 gene=XLOC\_022332

Query: 1 TGCCAAAGG--A-AATTTGCCCCG 21

|||||||:|:\*|\*|||||\*|||\*

Sbjct: 1545 ACGGTTTTTTTTATTAAACAGGGG 1522

>osa-miR399k MIMAT0000994 Score: 4.5 TCONS\_00038694 gene=XLOC\_022332

Query: 1 TGCCAAAGG--A-AATTTGCCCCG 21

|||||||:|:\*|\*|||||\*|||\*

Sbjct: 1943 ACGGTTTTTTTTATTAAACAGGGG 1920

>osa-miR399k MIMAT0000994 Score: 4.5 TCONS\_00038695 gene=XLOC\_022332

Query: 1 TGCCAAAGG--A-AATTTGCCCCG 21

|||||||:|:\*|\*|||||\*|||\*

Sbjct: 1940 ACGGTTTTTTTTATTAAACAGGG 1917

>osa-miR395i MIMAT0000964 Score: 4.5 TCONS\_00100257 gene=XLOC\_057032

Query: 1 GTGAAGTGT--T-TGGGGGAAGTC 21

|||||:|:\*|\*|||:|\*|||\*

Sbjct: 1232 CACTTTATAGTACACCTCTTTGAT 1209

>osa-miR395v MIMAT0003876 Score: 4.5 TCONS\_00100257 gene=XLOC\_057032

Query: 1 GTGAAGTAT--T-TGGCGGAAGTC 21

|||||:||\*|\*|||\*|:||||\*

Sbjct: 1232 CACTTTATAGTACACCTCTTTGAT 1209

>osa-miR444a-3p.1 MIMAT0001617 Score: 4.0 TCONS\_00021500 gene=XLOC\_011874

Query: 1 TTGCTGCCT--CA-AGCTTGCTGC 21  
          |||||||\*\*||\*||\*|||:|\*|  
Sbjct: 538 AACGACGGAGGGTGTCCAACGGGG 515

>osa-miR529b MIMAT0005015 Score: 4.5 TCONS\_00098778 gene=XLOC\_056041

Query: 1 AGAAGAGAG-A--GAGTACAGCTT 21  
          \*|||:||||\*||\*|||:|\*|||  
Sbjct: 67 CCTTTTCTCCTCCCTCGAGTCGAA 44

>osa-miR1661-5p MIMAT0022871 Score: 4.0 TCONS\_00044881 gene=XLOC\_025454

Query: 1 GGATTGTTG--TC-TGGTTCAAGG 21  
          |||||:|\*\*||\*||\*|||\*||  
Sbjct: 137 CCTAACGACTGAGTACAAAGTCCC 114

>osa-miR1661-5p MIMAT0022871 Score: 4.5 TCONS\_00088748 gene=XLOC\_050158

Query: 1 GGATTGTTG-T--CTGGTTCAAGG 21  
          ||||:||||\*:\*|||\*||\*||  
Sbjct: 120 CCTAGCAACTGTTGACCAAGCTAC 97

>osa-miR395k MIMAT0000966 Score: 4.5 TCONS\_00100257 gene=XLOC\_057032

Query: 1 GTGAAGTGT--T-TGGGGGAACTC 21  
          ||||:|:|\*\*|\*|||:|:||||\*  
Sbjct: 1232 CACTTTATAGTACACCTCTTTGAT 1209

>osa-miR395d MIMAT0000960 Score: 4.5 TCONS\_00100257 gene=XLOC\_057032

Query: 1 GTGAAGTGT--T-TGGGGGAACTC 21  
          ||||:|:|\*\*|\*|||:|:||||\*  
Sbjct: 1232 CACTTTATAGTACACCTCTTTGAT 1209

>osa-miR2118q MIMAT0011756 Score: 4.5 TCONS\_00044208 gene=XLOC\_025107

Query: 1 TTCCCGATG--CC--TCCTATTCCTA 22  
|||\*|:|\*\*|\*\*|||||||:|  
Sbjct: 1124 AAGTGTTAGAGGATAGGATAAGGGT 1100

>osa-miR171h MIMAT0001077 Score: 4.5 TCONS\_00015380 gene=XLOC\_008313

Query: 1 GTGAGCCGA---ACCAATATCACT 21  
|||||\*|\*\*\*|\*|||\*|||||  
Sbjct: 422 CACTCGCCTTCCTGTTTAGAGTGA 399

>osa-miR171h MIMAT0001077 Score: 4.5 TCONS\_00015381 gene=XLOC\_008313

Query: 1 GTGAGCCGA---ACCAATATCACT 21  
|||||\*|\*\*\*|\*|||\*|||||  
Sbjct: 116 CACTCGCCTTCCTGTTTAGAGTGA 93

>osa-miR156k MIMAT0001020 Score: 4.0 TCONS\_00043170 gene=XLOC\_024537

Query: 1 TGACAGAAG--A-GAGAGAGCACA 21  
|||||||:\*\*|\*|||\*|||||\*  
Sbjct: 719 ACTGTCTTT CTCCTCACTCGTGC 696

>osa-miR156k MIMAT0001020 Score: 4.0 TCONS\_00043171 gene=XLOC\_024537

Query: 1 TGACAGAAG--A-GAGAGAGCACA 21  
|||||||:\*\*|\*|||\*|||||\*  
Sbjct: 719 ACTGTCTTT CTCCTCACTCGTGC 696

>osa-miR156k MIMAT0001020 Score: 4.0 TCONS\_00043172 gene=XLOC\_024537

Query: 1 TGACAGAAG--A-GAGAGAGCACA 21  
|||||||:\*\*|\*|||\*|||||\*  
Sbjct: 719 ACTGTCTTT CTCCTCACTCGTGC 696

>osa-miR156k MIMAT0001020 Score: 4.0 TCONS\_00043174 gene=XLOC\_024537

Query: 1 TGACAGAAG--A-GAGAGAGCACA 21

|||||||:\*\*|\*|||\*|||||\*  
Sbjct: 719 ACTGTCTTT CTCCTCACTCGTGC 696

>osa-miR156k MIMAT0001020 Score: 4.0 TCONS\_00043175 gene=XLOC\_024537

Query: 1 TGACAGAAG--A-GAGAGAGCACA 21  
|||||||:\*\*|\*|||\*|||||\*  
Sbjct: 719 ACTGTCTTT CTCCTCACTCGTGC 696

>osa-miR156k MIMAT0001020 Score: 4.0 TCONS\_00043176 gene=XLOC\_024537

Query: 1 TGACAGAAG--A-GAGAGAGCACA 21  
|||||||:\*\*|\*|||\*|||||\*  
Sbjct: 719 ACTGTCTTT CTCCTCACTCGTGC 696

>osa-miR156k MIMAT0001020 Score: 4.5 TCONS\_00068931 gene=XLOC\_038677

Query: 1 TGACAGAAGA---GAGAGAGCACA 21  
|||\*|||||\*\*\*|||||\*\*||  
Sbjct: 287 ACT TCTTCTAGCCTCTCTCCCGT 264

>osa-miR395j MIMAT0000965 Score: 4.5 TCONS\_00100257 gene=XLOC\_057032

Query: 1 GTGAAGTGT--T-TGGGGGAAGTCT 21  
|||||:|:\*\*|\*|||:|:||||\*  
Sbjct: 1232 CACTTTATAGTACACCTCTTTGAT 1209

>osa-miR160e-5p MIMAT0001030 Score: 2.5 TCONS\_00111350 gene=XLOC\_063639

Query: 1 TGCCTGGCT---CCCTGTATGCCG 21  
|||||||\*\*\*||\*|||||||  
Sbjct: 532 ACGGACCGAAAGGGAACATACGGC 509

>osa-miR171e-3p MIMAT0001066 Score: 4.5 TCONS\_00068198 gene=XLOC\_038327

Query: 1 TGATTGAGCC---GTGCCAATATC 21  
|||||||\*|\*\*\*|||\*|:|:  
Sbjct: 201 ACTAACTCTGTTTCACGGGTGTGG 178

>osa-miR171e-3p MIMAT0001066 Score: 4.5 TCONS\_00098418 gene=XLOC\_055846

```
Query:          1 TGATTGAGCCG---TGCCAATATC 21
                ||*|||:|****|||:|
Sbjct:          560 ACGAACTGACTAAACGGTTGTAG 537
```

>osa-miR166h-3p MIMAT0001073 Score: 3.5 TCONS\_00068571 gene=XLOC\_038526

```
Query:          1 TCGGACCAG---GCTTCATTCTC 21
                |||:|*||*||*|||:|
Sbjct:          839 AGCCTGGTTAAGCGAACTAAGGGG 816
```

>osa-miR164f MIMAT0001089 Score: 4.5 TCONS\_00100980 gene=XLOC\_057427

```
Query:          1 TGGAGAAGC-A-G-GGCACGTGCA 21
                |||:|*||*||*|||:|*|
Sbjct:          732 ACCTTTTCGTTGCGTCGTGTGC T 709
```

>osa-miR156f-5p MIMAT0000623 Score: 2.0 TCONS\_00043170 gene=XLOC\_024537

```
Query:          1 TGACAGAAG--A-GAGTGAGCAC 20
                |||:|*||*|||
Sbjct:          719 ACTGTCTTT CTCCTCACTCGTG 697
```

>osa-miR156f-5p MIMAT0000623 Score: 2.0 TCONS\_00043171 gene=XLOC\_024537

```
Query:          1 TGACAGAAG--A-GAGTGAGCAC 20
                |||:|*||*|||
Sbjct:          719 ACTGTCTTT CTCCTCACTCGTG 697
```

>osa-miR156f-5p MIMAT0000623 Score: 2.0 TCONS\_00043172 gene=XLOC\_024537

```
Query:          1 TGACAGAAG--A-GAGTGAGCAC 20
                |||:|*||*|||
Sbjct:          719 ACTGTCTTT CTCCTCACTCGTG 697
```

>osa-miR156f-5p MIMAT0000623 Score: 2.0 TCONS\_00043174 gene=XLOC\_024537

Query: 1 TGACAGAAG--A-GAGTGAGCAC 20  
|||||||:\*\*|\*|  
Sbjct: 719 ACTGTCTTT CTCCTCACTCGTG 697

>osa-miR156f-5p MIMAT0000623 Score: 2.0 TCONS\_00043175 gene=XLOC\_024537

Query: 1 TGACAGAAG--A-GAGTGAGCAC 20  
|||||||:\*\*|\*|  
Sbjct: 719 ACTGTCTTT CTCCTCACTCGTG 697

>osa-miR156f-5p MIMAT0000623 Score: 2.0 TCONS\_00043176 gene=XLOC\_024537

Query: 1 TGACAGAAG--A-GAGTGAGCAC 20  
|||||||:\*\*|\*|  
Sbjct: 719 ACTGTCTTT CTCCTCACTCGTG 697

>osa-miR156f-5p MIMAT0000623 Score: 4.5 TCONS\_00076760 gene=XLOC\_043053

Query: 1 TGACAGAAG-AG--AGTGAGCAC 20  
||\*|||\*|\*\*|||\*|\*  
Sbjct: 398 ACCGTCTCCTCTTCACTCCTT 376

>osa-miR156f-5p MIMAT0000623 Score: 4.5 TCONS\_00087104 gene=XLOC\_049223

Query: 1 TGACAGAAG-AG--AGTGAGCAC 20  
|||||||\*\*||\*\*||:|:|\*  
Sbjct: 1646 ACTGTCTTACTCT TCATTTGTT 1624

>osa-miR160f-5p MIMAT0001031 Score: 4.5 TCONS\_00111350 gene=XLOC\_063639

Query: 1 TGCCTGGCT---CCCTGAATGCCA 21  
|||||||\*\*\*|\*|\*|\*|\*  
Sbjct: 532 ACGGACCGAAAGGGAACATACGGC 509

>osa-miR444d.1 MIMAT0005974 Score: 4.0 TCONS\_00021500 gene=XLOC\_011874

Query: 1 TTGCTGCCT--CA-AGCTTGCTGC 21  
|||\*||\*||\*|||:|  
Sbjct: 538 AACGACGGAGGGTGTCCAACGGGG 515

>osa-miR166f MIMAT0000640 Score: 3.0 TCONS\_00068571 gene=XLOC\_038526

Query: 1 TCGGACCAG---GCTTCATTCCCC 21  
|||\*||\*||\*|||  
Sbjct: 839 AGCCTGGTTAAGCGAACTAAGGGG 816

>osa-miR319a-3p MIMAT0020915 Score: 3.5 TCONS\_00066648 gene=XLOC\_037329

Query: 1 ACTGGATGA---CGCGGGAGCTAA 21  
|||\*||\*||\*|||  
Sbjct: 2113 TGACCTACTTAATCGACCTCGATT 2090

>osa-miR395l MIMAT0000967 Score: 4.5 TCONS\_00100257 gene=XLOC\_057032

Query: 1 GTGAAGTGT--T-TGGGGGAACTC 21  
|||:|:|\*||\*|||:|:|\*  
Sbjct: 1232 CACTTTATAGTACACCTTTGAT 1209

>osa-miR827 MIMAT0009981 Score: 4.5 TCONS\_00069356 gene=XLOC\_038879

Query: 1 TTAGATGAC-C--ATCAGCAAACA 21  
|:|:|\*||\*||\*||\*||\*  
Sbjct: 1794 AGTTTACTGTGTATAGTCG TTAT 1771

>osa-miR395s MIMAT0000968 Score: 4.5 TCONS\_00100257 gene=XLOC\_057032

Query: 1 GTGAAGTGT--T-TGGGGGAACTC 21  
|||:|:|\*||\*|||:|:|\*  
Sbjct: 1232 CACTTTATAGTACACCTTTGAT 1209

>osa-miR395b MIMAT0000959 Score: 4.5 TCONS\_00100257 gene=XLOC\_057032

Query: 1 GTGAAGTGT--T-TGGGGGAACTC 21  
|||:|:|\*||\*|||:|:|\*  
Sbjct: 1232 CACTTTATAGTACACCTTTGAT 1209

Sbjct: 1232 CACTTTATAGTACACCTCTTTGAT 1209

>osa-miR166i-5p MIMAT0022883 Score: 4.5 TCONS\_00037124 gene=XLOC\_021483

Query: 1 AATGCAGTT-T--GATCCAAGATC 21  
||:|\*|\*|\*\*|||:|

Sbjct: 674 TTGTGTGAGTAGGCTAGGTTTGTAG 651

>osa-miR166i-5p MIMAT0022883 Score: 4.5 TCONS\_00037125 gene=XLOC\_021483

Query: 1 AATGCAGTT-T--GATCCAAGATC 21  
||:|\*|\*|\*\*|||:|

Sbjct: 2407 TTGTGTGAGTAGGCTAGGTTTGTAG 2384

>osa-miR444c.1 MIMAT0005971 Score: 4.0 TCONS\_00057276 gene=XLOC\_031772

Query: 1 TGTTGTCTC--AA-GCTTGCTGCC 21  
||:\*|||\*\*||\*\*|||

Sbjct: 140 ACGAAAGAGTTTGTAGGAACGACGG 117

>osa-miR159a.2 MIMAT0009200 Score: 4.5 TCONS\_00016968 gene=XLOC\_009228

Query: 1 TTGCATGCC-C--CAGGAGCTGCA 21  
|||:|\*\*|\*\*\*|||:|

Sbjct: 738 AACGTGCGATGTCATCCTTGACGT 715

>osa-miR156c-5p MIMAT0000620 Score: 2.0 TCONS\_00043170 gene=XLOC\_024537

Query: 1 TGACAGAAG--A-GAGTGAGCAC 20  
|||:|\*\*|\*|||

Sbjct: 719 ACTGTCTTT CTCCTCACTCGTG 697

>osa-miR156c-5p MIMAT0000620 Score: 2.0 TCONS\_00043171 gene=XLOC\_024537

Query: 1 TGACAGAAG--A-GAGTGAGCAC 20  
|||:|\*\*|\*|||

Sbjct: 719 ACTGTCTTT CTCCTCACTCGTG 697



>osa-miR156c-5p MIMAT0000620 Score: 2.0 TCONS\_00043172 gene=XLOC\_024537

Query: 1 TGACAGAAG--A-GAGTGAGCAC 20  
|||:\*\*\*|\*|||  
Sbjct: 719 ACTGTCTTT CTCCTCACTCGTG 697

>osa-miR156c-5p MIMAT0000620 Score: 2.0 TCONS\_00043174 gene=XLOC\_024537

Query: 1 TGACAGAAG--A-GAGTGAGCAC 20  
|||:\*\*\*|\*|||  
Sbjct: 719 ACTGTCTTT CTCCTCACTCGTG 697

>osa-miR156c-5p MIMAT0000620 Score: 2.0 TCONS\_00043175 gene=XLOC\_024537

Query: 1 TGACAGAAG--A-GAGTGAGCAC 20  
|||:\*\*\*|\*|||  
Sbjct: 719 ACTGTCTTT CTCCTCACTCGTG 697

>osa-miR156c-5p MIMAT0000620 Score: 2.0 TCONS\_00043176 gene=XLOC\_024537

Query: 1 TGACAGAAG--A-GAGTGAGCAC 20  
|||:\*\*\*|\*|||  
Sbjct: 719 ACTGTCTTT CTCCTCACTCGTG 697

>osa-miR156c-5p MIMAT0000620 Score: 4.5 TCONS\_00076760 gene=XLOC\_043053

Query: 1 TGACAGAAG-AG--AGTGAGCAC 20  
||\*|||\*||\*\*|||\*||\*  
Sbjct: 398 ACCGTCTTCTTTTCACTCCTT 376

>osa-miR156c-5p MIMAT0000620 Score: 4.5 TCONS\_00087104 gene=XLOC\_049223

Query: 1 TGACAGAAG-AG--AGTGAGCAC 20  
|||\*\*||\*\*||:|\*  
Sbjct: 1646 ACTGTCTTACTCT TCATTTGTT 1624

>osa-miR166e-5p MIMAT0022859 Score: 4.5 TCONS\_00072868 gene=XLOC\_040881

Query: 1 GGAATGTTG-T--CTGGTTCAAGG 21  
|:|||||||\*||\*\*|||\*||\*||:  
Sbjct: 2966 CTTTACAACAATCGACCACGGTTC 2943

>osa-miR166e-5p MIMAT0022859 Score: 4.5 TCONS\_00072869 gene=XLOC\_040881

Query: 1 GGAATGTTG-T--CTGGTTCAAGG 21  
|:|||||||\*||\*\*|||\*||\*||:  
Sbjct: 3719 CTTTACAACAATCGACCACGGTTC 3696

>osa-miR166e-5p MIMAT0022859 Score: 4.5 TCONS\_00102306 gene=XLOC\_058088

Query: 1 GGAATGTTGT--C-TGGTTCAAGG 21  
|||||||:|\*\*||\*|||\*|||:  
Sbjct: 452 CCTTACAGTACTGTACCACGTTTT 429

>osa-miR168a-5p MIMAT0001045 Score: 4.5 TCONS\_00018461 gene=XLOC\_010132

Query: 1 TCGCTTGGT---GCAGATCGGGAC 21  
:|\*|||\*\*||:|:|||||  
Sbjct: 1113 GGCCAACCATTGTGTTGGCCCTG 1090

>osa-miR168a-5p MIMAT0001045 Score: 4.5 TCONS\_00018462 gene=XLOC\_010132

Query: 1 TCGCTTGGT---GCAGATCGGGAC 21  
:|\*|||\*\*||:|:|||||  
Sbjct: 1160 GGCCAACCATTGTGTTGGCCCTG 1137

>osa-miR168a-5p MIMAT0001045 Score: 4.5 TCONS\_00069605 gene=XLOC\_038990

Query: 1 TCGCTTGGT--GC-AGATCGGGAC 21  
\*|\*|||\*\*||\*|||\*|||  
Sbjct: 464 CGCGAACCCGCGATCTAGGCCTG 441

>osa-miR168a-5p MIMAT0001045 Score: 3.5 TCONS\_00087860 gene=XLOC\_049723

Query: 1 TCGCTTGGT-G-C-AGATCGGGAC 21



>osa-miR156i MIMAT0000626 Score: 2.0 TCONS\_00043176 gene=XLOC\_024537

```
Query:          1 TGACAGAAG--A-GAGTGAGCAC 20
                ||| | | | | | : ** | * | | | | | | | | |
Sbjct:          719 ACTGTCTTT CTCCTCACTCGTG 697
```

>osa-miR156i MIMAT0000626 Score: 4.5 TCONS\_00076760 gene=XLOC\_043053

```
Query:          1 TGACAGAAG-AG--AGTGAGCAC 20
                || * | | | | | * | ** | | | | | | * | *
Sbjct:          398 ACCGTCTTCCTCTTTCACTCCTT 376
```

>osa-miR156i MIMAT0000626 Score: 4.5 TCONS\_00087104 gene=XLOC\_049223

```
Query:          1 TGACAGAAG-AG--AGTGAGCAC 20
                ||| | | | | | ** | ** | | | | : | : | *
Sbjct:          1646 ACTGTCTTACTCT TCATTTGTT 1624
```

>osa-miR171c-3p MIMAT0001064 Score: 4.5 TCONS\_00068198 gene=XLOC\_038327

```
Query:          1 TGATTGAGCC---GTGCCAATATC 21
                ||| | | | | | * | *** | | | | | * | : | : |
Sbjct:          201 ACTAACTCTGTTTCACGGGTGTGG 178
```

>osa-miR171c-3p MIMAT0001064 Score: 4.5 TCONS\_00098418 gene=XLOC\_055846

```
Query:          1 TGATTGAGCCG---TGCCAATATC 21
                || * | | | | : | * | *** | | | | | : | | |
Sbjct:          560 ACGAACTTGACTAAACGGTTGTAG 537
```

>osa-miR395t MIMAT0000969 Score: 4.0 TCONS\_00100257 gene=XLOC\_057032

```
Query:          1 GTGAAGTGT--T-TGGGGAAACTC 21
                ||| | | | : | : | ** | * | | | | : | | | | | *
Sbjct:          1232 CACTTTATAGTACACCTCTTTGAT 1209
```

>osa-miR395n MIMAT0003871 Score: 4.5 TCONS\_00100257 gene=XLOC\_057032

Query: 1 GTGAAGTGT--T-TGGGGGAAGTCT 21  
|||:|:|\*\*|\*|||:|:|\*  
Sbjct: 1232 CACTTTATAGTACACCTCTTTGAT 1209

>osa-miR160d-5p MIMAT0000631 Score: 3.5 TCONS\_00111350 gene=XLOC\_063639

Query: 1 TGCCTGGCT---CCCTGTATGCCA 21  
|||||||\*\*||\*|||\*|||\*  
Sbjct: 532 ACGGACCGAAAGGGAACATACGGC 509

>osa-miR408-3p MIMAT0001079 Score: 4.0 TCONS\_00056472 gene=XLOC\_031355

Query: 1 CTGCACTGCCT---CTCCCTGGC 21  
|||||\*|||\*\*\*|\*|||\*|||  
Sbjct: 259 GACGTGCCGACCGGAAGGGGCG 236

>osa-miR408-3p MIMAT0001079 Score: 4.5 TCONS\_00051144 gene=XLOC\_028659

Query: 1 CTGCACTGC-CT--CTCCCTGGC 21  
|:|\*|:|\*|:\*\*\*|\*|||\*|||  
Sbjct: 172 GCGAGGCGTGGTCTGAAGGGGCG 149

>osa-miR408-3p MIMAT0001079 Score: 4.5 TCONS\_00094855 gene=XLOC\_053743

Query: 1 CTGCACTGC--CT-CTCCCTGGC 21  
|||\*|||\*\*|\*\*|||\*|||\*|||  
Sbjct: 699 GACGAGACGTAGACTAAGGGAACG 676

>osa-miR171b MIMAT0001063 Score: 4.5 TCONS\_00068198 gene=XLOC\_038327

Query: 1 TGATTGAGCC---GTGCCAATATC 21  
|||||||\*|\*\*\*|\*|||\*|:|:|  
Sbjct: 201 ACTAACTCTGTTTCACGGGTGTGG 178

>osa-miR171b MIMAT0001063 Score: 4.5 TCONS\_00098418 gene=XLOC\_055846

Query: 1 TGATTGAGCCG---TGCCAATATC 21  
||\*|||:|\*\*\*\*|||:|  
Sbjct: 560 ACGAACTTGACTAAACGGTTGTAG 537

>osa-miR171f-3p MIMAT0001067 Score: 4.5 TCONS\_00068198 gene=XLOC\_038327

Query: 1 TGATTGAGCC---GTGCCAATATC 21  
|||||||\*\*\*\*|||\*|:|  
Sbjct: 201 ACTAACTCTGTTTCACGGGTGTGG 178

>osa-miR171f-3p MIMAT0001067 Score: 4.5 TCONS\_00098418 gene=XLOC\_055846

Query: 1 TGATTGAGCCG---TGCCAATATC 21  
||\*|||:|\*\*\*\*|||:|  
Sbjct: 560 ACGAACTTGACTAAACGGTTGTAG 537

>osa-miR166l-3p MIMAT0001038 Score: 4.5 TCONS\_00011308 gene=XLOC\_006054

Query: 1 TCGGACCAG---GCTTCAATCCCT 21  
|||||||\*\*\*||:||||\*|:  
Sbjct: 462 AGCCTGGTACTGCGGAGTTAAGGG 439

>osa-miR166l-3p MIMAT0001038 Score: 4.5 TCONS\_00068571 gene=XLOC\_038526

Query: 1 TCGGACCAG---GCTTCAATCCCT 21  
|||||||:\*\*\*|||\*|\*|:  
Sbjct: 839 AGCCTGGTTAAGCGAACTAAGGGG 816

>osa-miR166a-5p MIMAT0022855 Score: 4.5 TCONS\_00072868 gene=XLOC\_040881

Query: 1 GGAATGTTG-T--CTGGTTCAAGG 21  
|:||||||\*||\*|||\*|\*|:  
Sbjct: 2966 CTTTACAACAATCGACCACGGTTC 2943

>osa-miR166a-5p MIMAT0022855 Score: 4.5 TCONS\_00072869 gene=XLOC\_040881

Query: 1 GGAATGTTG-T--CTGGTTCAAGG 21  
|:||||||\*||\*|||\*|\*|:  
Sbjct: 2966 CTTTACAACAATCGACCACGGTTC 2943

Sbjct: 3719 CTTTACAACAATCGACCACGGTTC 3696

>osa-miR166a-5p MIMAT0022855 Score: 4.5 TCONS\_00102306 gene=XLOC\_058088

Query: 1 GGAATGTTGT--C-TGGTTCAAGG 21

|||||||:|\*\*|\*|||\*|||:|

Sbjct: 452 CCTTACAGTACTGTACCACGTTTT 429

>osa-miR156b-3p MIMAT0022845 Score: 4.0 TCONS\_00107603 gene=XLOC\_061457

Query: 1 GCTCACTCT---CTATCTGTCAGC 21

|||||||\*\*\*|\*|\*|:||||

Sbjct: 418 CGAGTGAGAGAAGACAGTCGGTCG 395

>osa-miR156b-3p MIMAT0022845 Score: 4.0 TCONS\_00107604 gene=XLOC\_061457

Query: 1 GCTCACTCT---CTATCTGTCAGC 21

|||||||\*\*\*|\*|\*|:||||

Sbjct: 399 CGAGTGAGAGAAGACAGTCGGTCG 376

>osa-miR164e MIMAT0001035 Score: 4.0 TCONS\_00055782 gene=XLOC\_031038

Query: 1 TGGAGAAGC--AG-GGCACGTGAG 21

|||||||\*\*|\*||\*\*|:|||

Sbjct: 547 ACCTCTTCGAGTCGCCGCCGCTC 524

>osa-miR164e MIMAT0001035 Score: 4.0 TCONS\_00055783 gene=XLOC\_031038

Query: 1 TGGAGAAGC--AG-GGCACGTGAG 21

|||||||\*\*|\*||\*\*|:|||

Sbjct: 547 ACCTCTTCGAGTCGCCGCCGCTC 524

>osa-miR164e MIMAT0001035 Score: 4.0 TCONS\_00055784 gene=XLOC\_031038

Query: 1 TGGAGAAGC--AG-GGCACGTGAG 21

|||||||\*\*|\*||\*\*|:|||

Sbjct: 553 ACCTCTTCGAGTCGCCGCCGCTC 530

>osa-miR164e MIMAT0001035 Score: 4.0 TCONS\_00055785 gene=XLOC\_031038

Query: 1 TGGAGAAGC--AG-GGCACGTGAG 21  
|||||||\*\*|\*||\*\*|:|  
Sbjct: 553 ACCTCTTCGAGTCGCCGCCGCTC 530

>osa-miR166e-3p MIMAT0000639 Score: 4.0 TCONS\_00068571 gene=XLOC\_038526

Query: 1 TCGAACCAG---GCTTCATTCCCC 21  
|||\*|||:\*\*\*|||\*|||  
Sbjct: 839 AGCCTGGTTAAGCGAACTAAGGGG 816

>osa-miR166j-3p MIMAT0001088 Score: 3.0 TCONS\_00068571 gene=XLOC\_038526

Query: 1 TCGGACCAG---GCTTCATTCCCC 21  
|||||||:\*\*\*|||\*|||  
Sbjct: 839 AGCCTGGTTAAGCGAACTAAGGGG 816

>osa-miR1435 MIMAT0005986 Score: 3.5 TCONS\_00010861 gene=XLOC\_005835

Query: 1 TTTCTTAAGT--C-AACTTTTT 20  
|||\*|:||||\*\*|\*|||:|  
Sbjct: 418 AAACAGTTCACGGTTTGGAAAA 396

>osa-miR1435 MIMAT0005986 Score: 4.5 TCONS\_00014791 gene=XLOC\_007899

Query: 1 TTTCTTAAG--T-CAAACTTTT 20  
|||\*||\*\*|\*\*|\*|||  
Sbjct: 74 AAA ACATCACAGGTTTGA AAAA 52

>osa-miR1435 MIMAT0005986 Score: 4.5 TCONS\_00029525 gene=XLOC\_016842

Query: 1 TTTCTTAAG---TCAAACTTTT 20  
|||||\*|\*\*\*|||\*||  
Sbjct: 203 AAAGAAATCACTAGTTTGTACAA 181

>osa-miR1435 MIMAT0005986 Score: 4.0 TCONS\_00034465 gene=XLOC\_019858



Query: 1 TTTCTTAAG--T-CAAAC TTTT 20  
|||:|:\*\*|\*|\*|  
Sbjct: 935 AAAGGTTTGAA GGTGAAAA 913

>osa-miR1435 MIMAT0005986 Score: 4.5 TCONS\_00071735 gene=XLOC\_040137

Query: 1 TTTCTTAAG---TCAAAC TTTT 20  
|||\*|\*|:\*\*\*|\*|  
Sbjct: 628 AAAGAAGTTTAAAGGTTGAAAAG 606

>osa-miR1435 MIMAT0005986 Score: 4.5 TCONS\_00090532 gene=XLOC\_051185

Query: 1 TTTCTTAAG-T--CAAAC TTTT 20  
||\*|\*|\*|\*\*|\*|  
Sbjct: 1148 AAACAAC TCAAG GTTGAACAA 1126

>osa-miR1435 MIMAT0005986 Score: 4.0 TCONS\_00104489 gene=XLOC\_059506

Query: 1 TTTCTTAAGT---CAAAC TTTT 20  
|||\*|\*|\*|\*\*|\*|:|\*|  
Sbjct: 271 AAAGAATTCAGTCGTTGGAGACA 249

>osa-miR1435 MIMAT0005986 Score: 4.0 TCONS\_00104492 gene=XLOC\_059506

Query: 1 TTTCTTAAGT---CAAAC TTTT 20  
|||\*|\*|\*|\*\*|\*|:|\*|  
Sbjct: 250 AAAGAATTCAGTCGTTGGAGACA 228

>osa-miR1435 MIMAT0005986 Score: 4.0 TCONS\_00110274 gene=XLOC\_062969

Query: 1 TTTCTTAAG---TCAAAC TTTT 20  
|||\*|\*|:\*\*\*|\*|  
Sbjct: 1417 AAAGAAGTTTGAAGTTGAAAAA 1395

>osa-miR1435 MIMAT0005986 Score: 4.5 TCONS\_00107680 gene=XLOC\_061504

Query: 1 TTTCTTAAG---TCAAAC TTTT 20

|||||\*|:\*\*\*|\*|:|:|:  
Sbjct: 317 AAAGAAGTTGAAGGTGAAAAG 295

>osa-miR444b.1 MIMAT0005969 Score: 4.0 TCONS\_00057276 gene=XLOC\_031772

Query: 1 TGTTGTCTC--AA-GCTTGCTGCC 21  
|:|\*|||\*|\*\*|||:|:  
Sbjct: 140 ACGAAAGAGTTTATAGGAACGACGG 117

>osa-miR395c MIMAT0000972 Score: 4.5 TCONS\_00029176 gene=XLOC\_016647

Query: 1 GTGAAGTGT---TTGGAGGAACTC 21  
|\*|||\*|\*\*\*:|:|:|:  
Sbjct: 481 CAATTCAAATCGGACTTCCTTGAG 458

>osa-miR395c MIMAT0000972 Score: 4.0 TCONS\_00100257 gene=XLOC\_057032

Query: 1 GTGAAGTGT--T-TGGAGGAACTC 21  
|:|:|\*|\*|:|:|\*|:  
Sbjct: 1232 CACTTTATAGTACACCTCTTGAT 1209

>osa-miR156a MIMAT0000618 Score: 2.0 TCONS\_00043170 gene=XLOC\_024537

Query: 1 TGACAGAAG--A-GAGTGAGCAC 20  
|:|:|\*|\*|:|:|:  
Sbjct: 719 ACTGTCTTT CTCCTCACTCGTG 697

>osa-miR156a MIMAT0000618 Score: 2.0 TCONS\_00043171 gene=XLOC\_024537

Query: 1 TGACAGAAG--A-GAGTGAGCAC 20  
|:|:|\*|\*|:|:|:  
Sbjct: 719 ACTGTCTTT CTCCTCACTCGTG 697

>osa-miR156a MIMAT0000618 Score: 2.0 TCONS\_00043172 gene=XLOC\_024537

Query: 1 TGACAGAAG--A-GAGTGAGCAC 20  
|:|:|\*|\*|:|:|:  
Sbjct: 719 ACTGTCTTT CTCCTCACTCGTG 697

>osa-miR156a MIMAT0000618 Score: 2.0 TCONS\_00043174 gene=XLOC\_024537

```
Query:          1 TGACAGAAG--A-GAGTGAGCAC 20
                ||| ||| ||| : ** | * ||| ||| ||| |||
Sbjct:          719 ACTGTCTTT CTCCTCACTCGTG 697
```

>osa-miR156a MIMAT0000618 Score: 2.0 TCONS\_00043175 gene=XLOC\_024537

```
Query:          1 TGACAGAAG--A-GAGTGAGCAC 20
                ||| ||| ||| : ** | * ||| ||| ||| |||
Sbjct:          719 ACTGTCTTT CTCCTCACTCGTG 697
```

>osa-miR156a MIMAT0000618 Score: 2.0 TCONS\_00043176 gene=XLOC\_024537

```
Query:          1 TGACAGAAG--A-GAGTGAGCAC 20
                ||| ||| ||| : ** | * ||| ||| ||| |||
Sbjct:          719 ACTGTCTTT CTCCTCACTCGTG 697
```

>osa-miR156a MIMAT0000618 Score: 4.5 TCONS\_00076760 gene=XLOC\_043053

```
Query:          1 TGACAGAAG-AG--AGTGAGCAC 20
                || * ||| ||| * || ** ||| ||| * || *
Sbjct:          398 ACCGTCTTCCTCTTTCACTCCTT 376
```

>osa-miR156a MIMAT0000618 Score: 4.5 TCONS\_00087104 gene=XLOC\_049223

```
Query:          1 TGACAGAAG-AG--AGTGAGCAC 20
                ||| ||| ||| ** || ** ||| : | : | *
Sbjct:          1646 ACTGTCTTACTCT TCATTTGTT 1624
```

>osa-miR166k-5p MIMAT0022870 Score: 4.5 TCONS\_00010856 gene=XLOC\_005835

```
Query:          1 GGTTTGTTG---TCTGGCTCGAGG 21
                : ||| ||| ||| *** ||| ||| * | * ||| :
Sbjct:          1685 TCAAACAACAGTAGACCAATCTCT 1662
```

>osa-miR166k-5p MIMAT0022870 Score: 4.5 TCONS\_00027308 gene=XLOC\_015481

Query: 1 GGTTTGTTGT-C--TGGCTCGAGG 21  
||||:|:|:|\*|\*\*:\*| |||||  
Sbjct: 209 CCAAGCGACGTGTCGGCGAGCTCC 186

>osa-miR156h-5p MIMAT0031156 Score: 2.0 TCONS\_00043170 gene=XLOC\_024537

Query: 1 TGACAGAAG--A-GAGTGAGCAC 20  
|||||||:\*\*|\*| |||||  
Sbjct: 719 ACTGTCTTT CTCCTCACTCGTG 697

>osa-miR156h-5p MIMAT0031156 Score: 2.0 TCONS\_00043171 gene=XLOC\_024537

Query: 1 TGACAGAAG--A-GAGTGAGCAC 20  
|||||||:\*\*|\*| |||||  
Sbjct: 719 ACTGTCTTT CTCCTCACTCGTG 697

>osa-miR156h-5p MIMAT0031156 Score: 2.0 TCONS\_00043172 gene=XLOC\_024537

Query: 1 TGACAGAAG--A-GAGTGAGCAC 20  
|||||||:\*\*|\*| |||||  
Sbjct: 719 ACTGTCTTT CTCCTCACTCGTG 697

>osa-miR156h-5p MIMAT0031156 Score: 2.0 TCONS\_00043174 gene=XLOC\_024537

Query: 1 TGACAGAAG--A-GAGTGAGCAC 20  
|||||||:\*\*|\*| |||||  
Sbjct: 719 ACTGTCTTT CTCCTCACTCGTG 697

>osa-miR156h-5p MIMAT0031156 Score: 2.0 TCONS\_00043175 gene=XLOC\_024537

Query: 1 TGACAGAAG--A-GAGTGAGCAC 20  
|||||||:\*\*|\*| |||||  
Sbjct: 719 ACTGTCTTT CTCCTCACTCGTG 697

>osa-miR156h-5p MIMAT0031156 Score: 2.0 TCONS\_00043176 gene=XLOC\_024537

Query: 1 TGACAGAAG--A-GAGTGAGCAC 20  
||| | | | | | | | : \*\* | \* | | | | | | | | | |  
Sbjct: 719 ACTGTCTTT CTCCTCACTCGTG 697

>osa-miR156h-5p MIMAT0031156 Score: 4.5 TCONS\_00076760 gene=XLOC\_043053

Query: 1 TGACAGAAG-AG--AGTGAGCAC 20  
|| \* | | | | | | \* | | \*\* | | | | | | \* | \*  
Sbjct: 398 ACCGTCTTCTCTTTCACCTCCTT 376

>osa-miR156h-5p MIMAT0031156 Score: 4.5 TCONS\_00087104 gene=XLOC\_049223

Query: 1 TGACAGAAG-AG--AGTGAGCAC 20  
||| | | | | | | | \*\* | | \*\* | | | | | | : | : | \*  
Sbjct: 1646 ACTGTCTTACTCT TCATTTGTT 1624

>osa-miR171d-3p MIMAT0001065 Score: 4.5 TCONS\_00068198 gene=XLOC\_038327

Query: 1 TGATTGAGCC---GTGCCAATATC 21  
||| | | | | | | \* | \*\*\* | | | | | \* | : | : |  
Sbjct: 201 ACTAACTCTGTTTCACGGGTGTGG 178

>osa-miR171d-3p MIMAT0001065 Score: 4.5 TCONS\_00098418 gene=XLOC\_055846

Query: 1 TGATTGAGCCG---TGCCAATATC 21  
|| \* | | | | : \* | \*\*\* | | | | | : | | |  
Sbjct: 560 ACGAACTTGACTAAACGGTTGTAG 537

>osa-miR397b MIMAT0000981 Score: 4.5 TCONS\_00037671 gene=XLOC\_021753

Query: 1 TTATTGAGT--GC-AGCGTTGATG 21  
|| \* | | | | \* | \*\* | | \* | | | | | | \* | |  
Sbjct: 2975 AACAACTAAGTCGATCGCAACCAC 2952

>osa-miR166c-3p MIMAT0000637 Score: 3.0 TCONS\_00068571 gene=XLOC\_038526

Query: 1 TCGGACCAG---GCTTCATTCCCC 21  
||| | | | | | | : \*\*\* | | | | \* | | | | | | | |

Sbjct: 839 AGCCTGGTTAAGCGAACTAAGGGG 816

>osa-miR164a MIMAT0000634 Score: 4.5 TCONS\_00013466 gene=XLOC\_007072

Query: 1 TGGAGAAGCA---GGGCACGTGCA 21

||:|||||||:::\*|||::| ||:

Sbjct: 453 ACGTCTTCGTAAGTCCGTGC-CGC 430

>osa-miR164b MIMAT0000634 Score: 4.5 TCONS\_00013466 gene=XLOC\_007072

Query: 1 TGGAGAAGCA---GGGCACGTGCA 21

||:|||||||:::\*|||::| ||:

Sbjct: 453 ACGTCTTCGTAAGTCCGTGC-CGC 430

>osa-miR164f MIMAT0000634 Score: 4.5 TCONS\_00013466 gene=XLOC\_007072

Query: 1 TGGAGAAGCA---GGGCACGTGCA 21

||:|||||||:::\*|||::| ||:

Sbjct: 453 ACGTCTTCGTAAGTCCGTGC-CGC 430
